# Supplementary material for: Reduced fetal cerebral blood flow predicts perinatal mortality in a mouse model of prenatal alcohol and cannabinoid exposure
Source: BMC Pregnancy Childbirth. 2024 Apr 11;24:263. doi: 10.1186/s12884-024-06436-9 (PMC11007973; doi:10.1186/s12884-024-06436-9)
Supplement: Supplementary file 1 — Supplementary Material 1 [file 12884_2024_6436_MOESM1_ESM.xlsx]

## Sheet: Table of Contents
Table of Contents
Tab	Title
Supp. Table 1	Dam Weight Gain: statistical output (means, standard error, confidence intervals and adjusted p values)
Supp. Table 2	Middle cerebral artery Velocity-Time Integral: statistical output (means, standard error, confidence intervals and adjusted p values)
Supp. Table 3	Within-animal changes in middle cerebral artery Velocity-Time Integral from Gestational Days 13.5-16: statistical output (means, standard error, confidence intervals and adjusted p values)
Supp. Table 4	Within-animal changes in middle cerebral artery Velocity-Time Integral from Gestational Days 11-16: statistical output (means, standard error, confidence intervals and adjusted p values)
Supp. Table 5	Middle cerebral artery Acceleration: statistical output (means, standard error, confidence intervals and adjusted p values)
Supp. Table 6	Middle cerebral artery Peak Systolic Velocity: statistical output (means, standard error, confidence intervals and adjusted p values)
Supp. Table 7	Internal carotid artery Velocity-Time Integral: statistical output (means, standard error, confidence intervals and adjusted p values)
Supp. Table 8	Within-animal changes in internal carotid artery Velocity-Time Integral from Gestational Days 11-16: statistical output (means, standard error, confidence intervals and adjusted p values)
Supp. Table 9	Internal carotid artery Acceleration: statistical output (means, standard error, confidence intervals and adjusted p values)
Supp. Table 10	Internal carotid artery Peak Systolic Velocity: statistical output (means, standard error, confidence intervals and adjusted p values)
Supp. Table 11	Velocity-Time Integral cerebroplacental ratios: statistical output (means, standard error, confidence intervals and adjusted p values)
Supp. Table 12	Within-animal changes in Velocity-Time Integral cerebroplacental ratios from Gestational Days 11-16: statistical output (means, standard error, confidence intervals and adjusted p values)

## Sheet: Supp. Table 1. Dam Weight Gain
Column1	Column2	Column3	Column4	Column5	Column6	Column7	Column8	Column9
Within each row
Number of families	3
Number of comparisons per family	6
Alpha	0.05
Tukey's multiple comparisons test	Mean Diff.	95.00% CI of diff.	Below threshold?	Summary	Adjusted P Value
G10
Control vs. Alcohol	0.1444	-1.421 to 1.710	No	ns	0.9931
Control vs. Cannabinoid	0.2594	-1.267 to 1.786	No	ns	0.9614
Control vs. Alcohol+Cannabinoid	0.07361	-1.520 to 1.667	No	ns	0.9992
Alcohol vs. Cannabinoid	0.115	-1.599 to 1.829	No	ns	0.9974
Alcohol vs. Alcohol+Cannabinoid	-0.07083	-1.842 to 1.701	No	ns	0.9995
Cannabinoid vs. Alcohol+Cannabinoid	-0.1858	-1.929 to 1.557	No	ns	0.9905
G15
Control vs. Alcohol	1.278	-1.575 to 4.131	No	ns	0.5828
Control vs. Cannabinoid	0.7228	-1.720 to 3.165	No	ns	0.834
Control vs. Alcohol+Cannabinoid	3.844	0.6953 to 6.994	Yes	*	0.0138
Alcohol vs. Cannabinoid	-0.555	-3.393 to 2.283	No	ns	0.942
Alcohol vs. Alcohol+Cannabinoid	2.567	-0.8544 to 5.988	No	ns	0.1858
Cannabinoid vs. Alcohol+Cannabinoid	3.122	-0.01656 to 6.260	No	ns	0.0515
G18
Control vs. Alcohol	0.61	-3.481 to 4.701	No	ns	0.9718
Control vs. Cannabinoid	0.6838	-3.269 to 4.637	No	ns	0.9539
Control vs. Alcohol+Cannabinoid	4.598	-0.8459 to 10.04	No	ns	0.1036
Alcohol vs. Cannabinoid	0.07381	-4.513 to 4.661	No	ns	>0.9999
Alcohol vs. Alcohol+Cannabinoid	3.988	-1.794 to 9.770	No	ns	0.2239
Cannabinoid vs. Alcohol+Cannabinoid	3.914	-1.794 to 9.622	No	ns	0.2218
Test details	Mean 1	Mean 2	Mean Diff.	SE of diff.	N1	N2	q	DF
G10
Control vs. Alcohol	3.494	3.35	0.1444	0.5433	9	9	0.376	14.99
Control vs. Cannabinoid	3.494	3.235	0.2594	0.5354	9	10	0.6853	16.47
Control vs. Alcohol+Cannabinoid	3.494	3.421	0.07361	0.5654	9	12	0.1841	18.53
Alcohol vs. Cannabinoid	3.35	3.235	0.115	0.6026	9	10	0.2699	16.89
Alcohol vs. Alcohol+Cannabinoid	3.35	3.421	-0.07083	0.6294	9	12	0.1591	18.82
Cannabinoid vs. Alcohol+Cannabinoid	3.235	3.421	-0.1858	0.6226	10	12	0.4221	20
G15
Control vs. Alcohol	8.078	6.8	1.278	0.9907	9	9	1.824	15.1
Control vs. Cannabinoid	8.078	7.355	0.7228	0.8588	9	10	1.19	16.93
Control vs. Alcohol+Cannabinoid	8.078	4.233	3.844	1.114	9	12	4.882	17.9
Alcohol vs. Cannabinoid	6.8	7.355	-0.555	0.9887	9	10	0.7938	15.52
Alcohol vs. Alcohol+Cannabinoid	6.8	4.233	2.567	1.217	9	12	2.983	18.99
Cannabinoid vs. Alcohol+Cannabinoid	7.355	4.233	3.122	1.112	10	12	3.97	18.27
G18
Control vs. Alcohol	12.73	12.12	0.61	1.409	9	9	0.6123	14.12
Control vs. Cannabinoid	12.73	12.04	0.6838	1.328	9	7	0.7282	11.79
Control vs. Alcohol+Cannabinoid	12.73	8.129	4.598	1.747	9	7	3.723	9.069
Alcohol vs. Cannabinoid	12.12	12.04	0.07381	1.578	9	7	0.06617	13.96
Alcohol vs. Alcohol+Cannabinoid	12.12	8.129	3.988	1.943	9	7	2.903	11.82
Cannabinoid vs. Alcohol+Cannabinoid	12.04	8.129	3.914	1.885	7	7	2.936	10.61

## Sheet: Supp. Table 2. MCA VTI
Within each row	compare columns (simple effects within rows)
Number of families	3
Number of comparisons per family	6
Alpha	0.05
Tukey's multiple comparisons test	Predicted (LS) mean diff.	95.00% CI of diff.	Below threshold?	Summary	Adjusted P Value
G11
Control vs. Alcohol	-0.1174	-3.008 to 2.774	No	ns	0.9996
Control vs. Cannabinoid	-1.13	-4.021 to 1.761	No	ns	0.7343
Control vs. Alcohol+Cannabinoid	-1.13	-4.021 to 1.761	No	ns	0.7339
Alcohol vs. Cannabinoid	-1.012	-3.998 to 1.973	No	ns	0.8096
Alcohol vs. Alcohol+Cannabinoid	-1.013	-3.999 to 1.973	No	ns	0.8093
Cannabinoid vs. Alcohol+Cannabinoid	-0.0007169	-2.987 to 2.985	No	ns	>0.9999
G13.5
Control vs. Alcohol	1.447	-1.443 to 4.338	No	ns	0.556
Control vs. Cannabinoid	1.438	-1.453 to 4.329	No	ns	0.5617
Control vs. Alcohol+Cannabinoid	1.144	-1.746 to 4.035	No	ns	0.7265
Alcohol vs. Cannabinoid	-0.009898	-2.996 to 2.976	No	ns	>0.9999
Alcohol vs. Alcohol+Cannabinoid	-0.303	-3.289 to 2.683	No	ns	0.9933
Cannabinoid vs. Alcohol+Cannabinoid	-0.2931	-3.279 to 2.693	No	ns	0.9939
G16
Control vs. Alcohol	4.476	1.585 to 7.367	Yes	***	0.0007
Control vs. Cannabinoid	4.507	1.616 to 7.398	Yes	***	0.0006
Control vs. Alcohol+Cannabinoid	6.211	3.320 to 9.102	Yes	****	<0.0001
Alcohol vs. Cannabinoid	0.03114	-2.955 to 3.017	No	ns	>0.9999
Alcohol vs. Alcohol+Cannabinoid	1.736	-1.250 to 4.722	No	ns	0.4264
Cannabinoid vs. Alcohol+Cannabinoid	1.705	-1.281 to 4.690	No	ns	0.4426
Test details	Predicted (LS) mean 1	Predicted (LS) mean 2	Predicted (LS) mean diff.	SE of diff.	N1	N2	q	DF
G11
Control vs. Alcohol	3.514	3.632	-0.1174	1.1	8	7	0.1509	75
Control vs. Cannabinoid	3.514	4.644	-1.13	1.1	8	7	1.452	75
Control vs. Alcohol+Cannabinoid	3.514	4.645	-1.13	1.1	8	7	1.453	75
Alcohol vs. Cannabinoid	3.632	4.644	-1.012	1.136	7	7	1.26	75
Alcohol vs. Alcohol+Cannabinoid	3.632	4.645	-1.013	1.136	7	7	1.261	75
Cannabinoid vs. Alcohol+Cannabinoid	4.644	4.645	-0.0007169	1.136	7	7	0.0008923	75
G13.5
Control vs. Alcohol	4.523	3.075	1.447	1.1	8	7	1.861	75
Control vs. Cannabinoid	4.523	3.085	1.438	1.1	8	7	1.848	75
Control vs. Alcohol+Cannabinoid	4.523	3.378	1.144	1.1	8	7	1.471	75
Alcohol vs. Cannabinoid	3.075	3.085	-0.009898	1.136	7	7	0.01232	75
Alcohol vs. Alcohol+Cannabinoid	3.075	3.378	-0.303	1.136	7	7	0.3771	75
Cannabinoid vs. Alcohol+Cannabinoid	3.085	3.378	-0.2931	1.136	7	7	0.3648	75
G16
Control vs. Alcohol	9.431	4.955	4.476	1.1	8	7	5.753	75
Control vs. Cannabinoid	9.431	4.924	4.507	1.1	8	7	5.793	75
Control vs. Alcohol+Cannabinoid	9.431	3.219	6.211	1.1	8	7	7.984	75
Alcohol vs. Cannabinoid	4.955	4.924	0.03114	1.136	7	7	0.03875	75
Alcohol vs. Alcohol+Cannabinoid	4.955	3.219	1.736	1.136	7	7	2.16	75
Cannabinoid vs. Alcohol+Cannabinoid	4.924	3.219	1.705	1.136	7	7	2.121	75

## Sheet: Supp. Table 3. Δ MCA VTI 
			Δ MCA VTI (G13.5-G16)
Number of families	1
Number of comparisons per family	6
Alpha	0.05
Tukey's multiple comparisons test	Mean Diff.	95.00% CI of diff.	Below threshold?	Summary	Adjusted P Value
CON vs. ALC	3.028	-1.620 to 7.676	No	ns	0.3005	A-B
CON vs. CB	2.658	-1.990 to 7.306	No	ns	0.4114	A-C
CON vs. ALC +CB	5.065	0.4172 to 9.713	Yes	*	0.029	A-D
ALC vs. CB	-0.37	-5.170 to 4.430	No	ns	0.9965	B-C
ALC vs. ALC +CB	2.037	-2.763 to 6.837	No	ns	0.6525	B-D
CB vs. ALC +CB	2.407	-2.393 to 7.207	No	ns	0.5235	C-D
Test details	Mean 1	Mean 2	Mean Diff.	SE of diff.	n1	n2	q	DF
CON vs. ALC	4.908	1.88	3.028	1.69	8	7	2.534	25
CON vs. CB	4.908	2.25	2.658	1.69	8	7	2.225	25
CON vs. ALC +CB	4.908	-0.157	5.065	1.69	8	7	4.239	25
ALC vs. CB	1.88	2.25	-0.37	1.745	7	7	0.2999	25
ALC vs. ALC +CB	1.88	-0.157	2.037	1.745	7	7	1.651	25
CB vs. ALC +CB	2.25	-0.157	2.407	1.745	7	7	1.95	25

## Sheet: Supp. Table 4. Δ MCA VTI (G11)
			Δ MCA VTI (G11-16)
Number of families	1
Number of comparisons per family	6
Alpha	0.05
Tukey's multiple comparisons test	Mean Diff.	95.00% CI of diff.	Below threshold?	Summary	Adjusted P Value
CON vs. ALC	4.593	0.3323 to 8.854	Yes	*	0.0312	A-B
CON vs. CB	6.323	2.062 to 10.58	Yes	**	0.0021	A-C
CON vs. ALC +CB	7.342	3.081 to 11.60	Yes	***	0.0004	A-D
ALC vs. CB	1.73	-2.670 to 6.131	No	ns	0.7037	B-C
ALC vs. ALC +CB	2.749	-1.652 to 7.149	No	ns	0.3357	B-D
CB vs. ALC +CB	1.019	-3.382 to 5.419	No	ns	0.9192	C-D
Test details	Mean 1	Mean 2	Mean Diff.	SE of diff.	n1	n2	q	DF
CON vs. ALC	5.917	1.323	4.593	1.549	8	7	4.193	25
CON vs. CB	5.917	-0.4067	6.323	1.549	8	7	5.773	25
CON vs. ALC +CB	5.917	-1.425	7.342	1.549	8	7	6.703	25
ALC vs. CB	1.323	-0.4067	1.73	1.6	7	7	1.53	25
ALC vs. ALC +CB	1.323	-1.425	2.749	1.6	7	7	2.43	25
CB vs. ALC +CB	-0.4067	-1.425	1.019	1.6	7	7	0.9004	25

## Sheet: Supp. Table 5. MCA Acceleration
Within each row	compare columns (simple effects within rows)
Number of families	3
Number of comparisons per family	6
Alpha	0.05
Tukey's multiple comparisons test	Predicted (LS) mean diff.	95.00% CI of diff.	Below threshold?	Summary	Adjusted P Value
G11.5
Control vs. Alcohol	71.6	-246.8 to 390.0	No	ns	0.9345
Control vs. Cannabinoid	-60.19	-378.6 to 258.2	No	ns	0.9596
Control vs. Alcohol+Cannabinoid	1.701	-316.7 to 320.1	No	ns	>0.9999
Alcohol vs. Cannabinoid	-131.8	-460.6 to 197.0	No	ns	0.7188
Alcohol vs. Alcohol+Cannabinoid	-69.9	-398.7 to 258.9	No	ns	0.9439
Cannabinoid vs. Alcohol+Cannabinoid	61.89	-266.9 to 390.7	No	ns	0.9601
G13.5
Control vs. Alcohol	157.8	-160.6 to 476.2	No	ns	0.5643
Control vs. Cannabinoid	148.2	-170.2 to 466.6	No	ns	0.6142
Control vs. Alcohol+Cannabinoid	215.4	-102.9 to 533.8	No	ns	0.2919
Alcohol vs. Cannabinoid	-9.603	-338.4 to 319.2	No	ns	0.9998
Alcohol vs. Alcohol+Cannabinoid	57.64	-271.2 to 386.5	No	ns	0.9673
Cannabinoid vs. Alcohol+Cannabinoid	67.24	-261.6 to 396.1	No	ns	0.9496
G16
Control vs. Alcohol	414.8	96.39 to 733.2	Yes	**	0.0054
Control vs. Cannabinoid	484	165.6 to 802.4	Yes	***	0.0008
Control vs. Alcohol+Cannabinoid	503.9	185.5 to 822.3	Yes	***	0.0005
Alcohol vs. Cannabinoid	69.24	-259.6 to 398.1	No	ns	0.9454
Alcohol vs. Alcohol+Cannabinoid	89.14	-239.7 to 418.0	No	ns	0.8919
Cannabinoid vs. Alcohol+Cannabinoid	19.9	-308.9 to 348.7	No	ns	0.9986
Test details	Predicted (LS) mean 1	Predicted (LS) mean 2	Predicted (LS) mean diff.	SE of diff.	N1	N2	q	DF
G11.5
Control vs. Alcohol	500.3	428.7	71.6	121.2	8	7	0.8356	75
Control vs. Cannabinoid	500.3	560.5	-60.19	121.2	8	7	0.7025	75
Control vs. Alcohol+Cannabinoid	500.3	498.6	1.701	121.2	8	7	0.01985	75
Alcohol vs. Cannabinoid	428.7	560.5	-131.8	125.1	7	7	1.489	75
Alcohol vs. Alcohol+Cannabinoid	428.7	498.6	-69.9	125.1	7	7	0.7899	75
Cannabinoid vs. Alcohol+Cannabinoid	560.5	498.6	61.89	125.1	7	7	0.6994	75
G13.5
Control vs. Alcohol	517.3	359.4	157.8	121.2	8	7	1.842	75
Control vs. Cannabinoid	517.3	369	148.2	121.2	8	7	1.73	75
Control vs. Alcohol+Cannabinoid	517.3	301.8	215.4	121.2	8	7	2.515	75
Alcohol vs. Cannabinoid	359.4	369	-9.603	125.1	7	7	0.1085	75
Alcohol vs. Alcohol+Cannabinoid	359.4	301.8	57.64	125.1	7	7	0.6513	75
Cannabinoid vs. Alcohol+Cannabinoid	369	301.8	67.24	125.1	7	7	0.7599	75
G16
Control vs. Alcohol	916.7	502	414.8	121.2	8	7	4.841	75
Control vs. Cannabinoid	916.7	432.7	484	121.2	8	7	5.649	75
Control vs. Alcohol+Cannabinoid	916.7	412.8	503.9	121.2	8	7	5.881	75
Alcohol vs. Cannabinoid	502	432.7	69.24	125.1	7	7	0.7824	75
Alcohol vs. Alcohol+Cannabinoid	502	412.8	89.14	125.1	7	7	1.007	75
Cannabinoid vs. Alcohol+Cannabinoid	432.7	412.8	19.9	125.1	7	7	0.2249	75

## Sheet: Supp.Table 6. MCA Peak Velocity
Within each row	compare columns (simple effects within rows)
Number of families	3
Number of comparisons per family	6
Alpha	0.05
Tukey's multiple comparisons test	Predicted (LS) mean diff.	95.00% CI of diff.	Below threshold?	Summary	Adjusted P Value
G11.5
Control vs. Alcohol	-0.6483	-23.18 to 21.88	No	ns	0.9998
Control vs. Cannabinoid	-7.405	-29.93 to 15.13	No	ns	0.8235
Control vs. Alcohol+Cannabinoid	-7.093	-29.62 to 15.44	No	ns	0.8414
Alcohol vs. Cannabinoid	-6.756	-30.03 to 16.51	No	ns	0.8708
Alcohol vs. Alcohol+Cannabinoid	-6.444	-29.71 to 16.82	No	ns	0.8857
Cannabinoid vs. Alcohol+Cannabinoid	0.3123	-22.96 to 23.58	No	ns	>0.9999
G13.5
Control vs. Alcohol	7.549	-14.98 to 30.08	No	ns	0.815
Control vs. Cannabinoid	7.432	-15.10 to 29.96	No	ns	0.822
Control vs. Alcohol+Cannabinoid	4.737	-17.79 to 27.27	No	ns	0.9456
Alcohol vs. Cannabinoid	-0.1172	-23.39 to 23.15	No	ns	>0.9999
Alcohol vs. Alcohol+Cannabinoid	-2.812	-26.08 to 20.46	No	ns	0.9888
Cannabinoid vs. Alcohol+Cannabinoid	-2.695	-25.96 to 20.57	No	ns	0.9901
G16
Control vs. Alcohol	28.94	6.405 to 51.47	Yes	**	0.0063
Control vs. Cannabinoid	33.02	10.49 to 55.55	Yes	**	0.0014
Control vs. Alcohol+Cannabinoid	37.6	15.07 to 60.13	Yes	***	0.0002
Alcohol vs. Cannabinoid	4.087	-19.18 to 27.36	No	ns	0.9672
Alcohol vs. Alcohol+Cannabinoid	8.662	-14.61 to 31.93	No	ns	0.7623
Cannabinoid vs. Alcohol+Cannabinoid	4.575	-18.69 to 27.84	No	ns	0.9549
Test details	Predicted (LS) mean 1	Predicted (LS) mean 2	Predicted (LS) mean diff.	SE of diff.	N1	N2	q	DF
G11.5
Control vs. Alcohol	29.07	29.72	-0.6483	8.574	8	7	0.1069	75
Control vs. Cannabinoid	29.07	36.48	-7.405	8.574	8	7	1.221	75
Control vs. Alcohol+Cannabinoid	29.07	36.16	-7.093	8.574	8	7	1.17	75
Alcohol vs. Cannabinoid	29.72	36.48	-6.756	8.856	7	7	1.079	75
Alcohol vs. Alcohol+Cannabinoid	29.72	36.16	-6.444	8.856	7	7	1.029	75
Cannabinoid vs. Alcohol+Cannabinoid	36.48	36.16	0.3123	8.856	7	7	0.04987	75
G13.5
Control vs. Alcohol	33.44	25.89	7.549	8.574	8	7	1.245	75
Control vs. Cannabinoid	33.44	26.01	7.432	8.574	8	7	1.226	75
Control vs. Alcohol+Cannabinoid	33.44	28.7	4.737	8.574	8	7	0.7813	75
Alcohol vs. Cannabinoid	25.89	26.01	-0.1172	8.856	7	7	0.01871	75
Alcohol vs. Alcohol+Cannabinoid	25.89	28.7	-2.812	8.856	7	7	0.449	75
Cannabinoid vs. Alcohol+Cannabinoid	26.01	28.7	-2.695	8.856	7	7	0.4303	75
G16
Control vs. Alcohol	66.22	37.29	28.94	8.574	8	7	4.772	75
Control vs. Cannabinoid	66.22	33.2	33.02	8.574	8	7	5.446	75
Control vs. Alcohol+Cannabinoid	66.22	28.63	37.6	8.574	8	7	6.201	75
Alcohol vs. Cannabinoid	37.29	33.2	4.087	8.856	7	7	0.6526	75
Alcohol vs. Alcohol+Cannabinoid	37.29	28.63	8.662	8.856	7	7	1.383	75
Cannabinoid vs. Alcohol+Cannabinoid	33.2	28.63	4.575	8.856	7	7	0.7306	75

## Sheet: Supp. Table 7. ICA VTI
Within each row	compare columns (simple effects within rows)
Number of families	3
Number of comparisons per family	6
Alpha	0.05
Tukey's multiple comparisons test	Predicted (LS) mean diff.	95.00% CI of diff.	Below threshold?	Summary	Adjusted P Value
G11
Control vs. Alcohol	0.8685	-2.315 to 4.052	No	ns	0.8901
Control vs. Cannabinoid	-0.1235	-3.307 to 3.060	No	ns	0.9996
Control vs. Alcohol+Cannabinoid	0.3871	-2.797 to 3.571	No	ns	0.9886
Alcohol vs. Cannabinoid	-0.992	-4.280 to 2.296	No	ns	0.8575
Alcohol vs. Alcohol+Cannabinoid	-0.4814	-3.770 to 2.807	No	ns	0.9805
Cannabinoid vs. Alcohol+Cannabinoid	0.5106	-2.778 to 3.799	No	ns	0.9769
G13.5
Control vs. Alcohol	2.106	-1.077 to 5.290	No	ns	0.3114
Control vs. Cannabinoid	0.3624	-2.821 to 3.546	No	ns	0.9906
Control vs. Alcohol+Cannabinoid	1.445	-1.739 to 4.628	No	ns	0.6336
Alcohol vs. Cannabinoid	-1.744	-5.032 to 1.544	No	ns	0.5072
Alcohol vs. Alcohol+Cannabinoid	-0.6618	-3.950 to 2.626	No	ns	0.9518
Cannabinoid vs. Alcohol+Cannabinoid	1.082	-2.206 to 4.370	No	ns	0.8229
G16
Control vs. Alcohol	2.37	-0.8133 to 5.554	No	ns	0.2139
Control vs. Cannabinoid	2.593	-0.5906 to 5.777	No	ns	0.15
Control vs. Alcohol+Cannabinoid	6.184	3.000 to 9.368	Yes	****	<0.0001
Alcohol vs. Cannabinoid	0.2228	-3.065 to 3.511	No	ns	0.998
Alcohol vs. Alcohol+Cannabinoid	3.814	0.5256 to 7.102	Yes	*	0.0165
Cannabinoid vs. Alcohol+Cannabinoid	3.591	0.3028 to 6.879	Yes	*	0.0268
Test details	Predicted (LS) mean 1	Predicted (LS) mean 2	Predicted (LS) mean diff.	SE of diff.	N1	N2	q	DF
G11
Control vs. Alcohol	4.661	3.792	0.8685	1.212	8	7	1.014	75
Control vs. Cannabinoid	4.661	4.784	-0.1235	1.212	8	7	0.1441	75
Control vs. Alcohol+Cannabinoid	4.661	4.274	0.3871	1.212	8	7	0.4518	75
Alcohol vs. Cannabinoid	3.792	4.784	-0.992	1.251	7	7	1.121	75
Alcohol vs. Alcohol+Cannabinoid	3.792	4.274	-0.4814	1.251	7	7	0.5441	75
Cannabinoid vs. Alcohol+Cannabinoid	4.784	4.274	0.5106	1.251	7	7	0.577	75
G13.5
Control vs. Alcohol	6.799	4.692	2.106	1.212	8	7	2.459	75
Control vs. Cannabinoid	6.799	6.436	0.3624	1.212	8	7	0.4229	75
Control vs. Alcohol+Cannabinoid	6.799	5.354	1.445	1.212	8	7	1.686	75
Alcohol vs. Cannabinoid	4.692	6.436	-1.744	1.251	7	7	1.971	75
Alcohol vs. Alcohol+Cannabinoid	4.692	5.354	-0.6618	1.251	7	7	0.7479	75
Cannabinoid vs. Alcohol+Cannabinoid	6.436	5.354	1.082	1.251	7	7	1.223	75
G16
Control vs. Alcohol	10.34	7.967	2.37	1.212	8	7	2.767	75
Control vs. Cannabinoid	10.34	7.744	2.593	1.212	8	7	3.027	75
Control vs. Alcohol+Cannabinoid	10.34	4.153	6.184	1.212	8	7	7.218	75
Alcohol vs. Cannabinoid	7.967	7.744	0.2228	1.251	7	7	0.2517	75
Alcohol vs. Alcohol+Cannabinoid	7.967	4.153	3.814	1.251	7	7	4.31	75
Cannabinoid vs. Alcohol+Cannabinoid	7.744	4.153	3.591	1.251	7	7	4.058	75

## Sheet: Supp Table 8. Δ ICA VTI
Number of families	1		Δ ICA VTI (G11-G16)
Number of comparisons per family	6
Alpha	0.05
Tukey's multiple comparisons test	Mean Diff.	95.00% CI of diff.	Below threshold?	Summary	Adjusted P Value
CON vs. ALC	2.048	-3.562 to 7.657	No	ns	0.7484	A-B
CON vs. CB	3.263	-2.347 to 8.872	No	ns	0.3969	A-C
CON vs. ALC +CB	6.343	0.7336 to 11.95	Yes	*	0.0224	A-D
ALC vs. CB	1.215	-4.579 to 7.008	No	ns	0.9381	B-C
ALC vs. ALC +CB	4.295	-1.498 to 10.09	No	ns	0.2009	B-D
CB vs. ALC +CB	3.08	-2.713 to 8.874	No	ns	0.4741	C-D
Test details	Mean 1	Mean 2	Mean Diff.	SE of diff.	n1	n2	q	DF
CON vs. ALC	6.222	4.175	2.048	2.039	8	7	1.42	25
CON vs. CB	6.222	2.96	3.263	2.039	8	7	2.262	25
CON vs. ALC +CB	6.222	-0.1205	6.343	2.039	8	7	4.399	25
ALC vs. CB	4.175	2.96	1.215	2.106	7	7	0.8157	25
ALC vs. ALC +CB	4.175	-0.1205	4.295	2.106	7	7	2.884	25
CB vs. ALC +CB	2.96	-0.1205	3.08	2.106	7	7	2.068	25

## Sheet: Supp. Table 9. ICA Acceleration
Within each row	compare columns (simple effects within rows)
Number of families	3
Number of comparisons per family	6
Alpha	0.05
Tukey's multiple comparisons test	Predicted (LS) mean diff.	95.00% CI of diff.	Below threshold?	Summary	Adjusted P Value
G11
Control vs. Alcohol	193.5	-263.8 to 650.8	No	ns	0.6836
Control vs. Cannabinoid	-75.68	-533.0 to 381.6	No	ns	0.9723
Control vs. Alcohol+Cannabinoid	106.2	-351.1 to 563.5	No	ns	0.9286
Alcohol vs. Cannabinoid	-269.1	-741.4 to 203.2	No	ns	0.4442
Alcohol vs. Alcohol+Cannabinoid	-87.29	-559.6 to 385.0	No	ns	0.9621
Cannabinoid vs. Alcohol+Cannabinoid	181.8	-290.4 to 654.1	No	ns	0.7431
G13.5
Control vs. Alcohol	144	-313.3 to 601.3	No	ns	0.8412
Control vs. Cannabinoid	105.2	-352.1 to 562.5	No	ns	0.9304
Control vs. Alcohol+Cannabinoid	125.3	-332.0 to 582.6	No	ns	0.8889
Alcohol vs. Cannabinoid	-38.83	-511.1 to 433.5	No	ns	0.9964
Alcohol vs. Alcohol+Cannabinoid	-18.74	-491.0 to 453.6	No	ns	0.9996
Cannabinoid vs. Alcohol+Cannabinoid	20.09	-452.2 to 492.4	No	ns	0.9995
G16
Control vs. Alcohol	150.1	-307.2 to 607.3	No	ns	0.8242
Control vs. Cannabinoid	300.1	-157.2 to 757.4	No	ns	0.3186
Control vs. Alcohol+Cannabinoid	536.9	79.57 to 994.2	Yes	*	0.0148
Alcohol vs. Cannabinoid	150	-322.3 to 622.3	No	ns	0.8378
Alcohol vs. Alcohol+Cannabinoid	386.8	-85.48 to 859.1	No	ns	0.1464
Cannabinoid vs. Alcohol+Cannabinoid	236.8	-235.5 to 709.1	No	ns	0.5548
Test details	Predicted (LS) mean 1	Predicted (LS) mean 2	Predicted (LS) mean diff.	SE of diff.	N1	N2	q	DF
G11
Control vs. Alcohol	688.2	494.7	193.5	174	8	7	1.572	75
Control vs. Cannabinoid	688.2	763.8	-75.68	174	8	7	0.6149	75
Control vs. Alcohol+Cannabinoid	688.2	582	106.2	174	8	7	0.8627	75
Alcohol vs. Cannabinoid	494.7	763.8	-269.1	179.7	7	7	2.118	75
Alcohol vs. Alcohol+Cannabinoid	494.7	582	-87.29	179.7	7	7	0.6868	75
Cannabinoid vs. Alcohol+Cannabinoid	763.8	582	181.8	179.7	7	7	1.431	75
G13.5
Control vs. Alcohol	762.1	618	144	174	8	7	1.17	75
Control vs. Cannabinoid	762.1	656.9	105.2	174	8	7	0.8548	75
Control vs. Alcohol+Cannabinoid	762.1	636.8	125.3	174	8	7	1.018	75
Alcohol vs. Cannabinoid	618	656.9	-38.83	179.7	7	7	0.3055	75
Alcohol vs. Alcohol+Cannabinoid	618	636.8	-18.74	179.7	7	7	0.1474	75
Cannabinoid vs. Alcohol+Cannabinoid	656.9	636.8	20.09	179.7	7	7	0.1581	75
G16
Control vs. Alcohol	1111	961.3	150.1	174	8	7	1.219	75
Control vs. Cannabinoid	1111	811.3	300.1	174	8	7	2.438	75
Control vs. Alcohol+Cannabinoid	1111	574.5	536.9	174	8	7	4.363	75
Alcohol vs. Cannabinoid	961.3	811.3	150	179.7	7	7	1.18	75
Alcohol vs. Alcohol+Cannabinoid	961.3	574.5	386.8	179.7	7	7	3.043	75
Cannabinoid vs. Alcohol+Cannabinoid	811.3	574.5	236.8	179.7	7	7	1.863	75

[truncated: 3 more sheets: SuppTable 10. ICA Peak Velocity, Supp.Table 11. VTI CPR All Days, Supp. Table 12. Δ VTI CPR ]
